# Supplementary material for: MOF derived high-density atomic platinum heterogeneous catalyst for C–H bond activation
Source: Royal Society of Chemistry journal article supplement (doi:10.1039/d0qm00040j), 2020-01-01
Supplement: d0qm00040j1.pdf [file d0qm00040j1.pdf]

## **Supplementary Information**

**MOF derived high-density atomic platinum heterogeneous  
catalyst for C-H bond activation**

**Zhuang et al.**

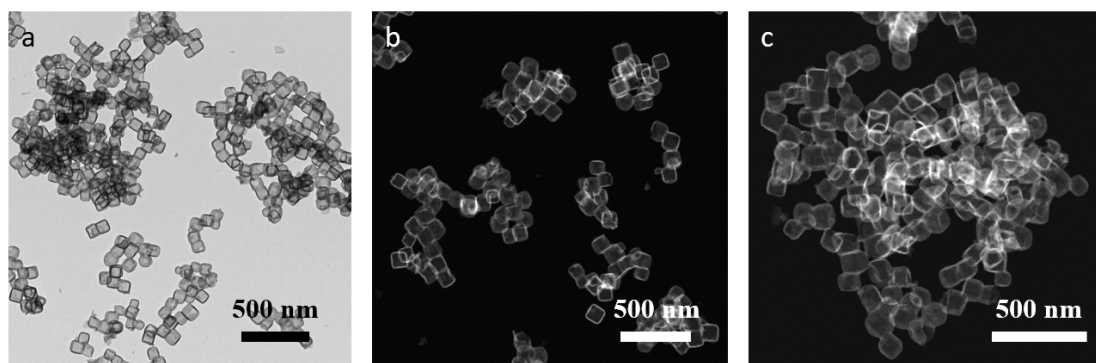

Figure S1. (a) TEM image of A-Pt NBs. (b), (c) HRTEM dark field images of A-Pt NBs.

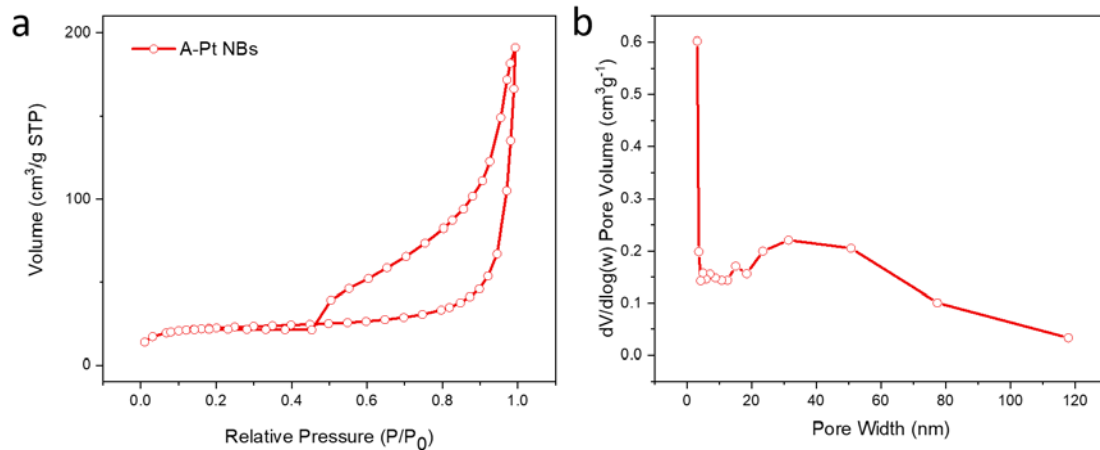

Figure S2. (a) Nitrogen adsorption-desorption isotherms of A-Pt NBs. (b) BJH Desorption  $dV/d\log(w)$  pore distribution of A-Pt NBs.

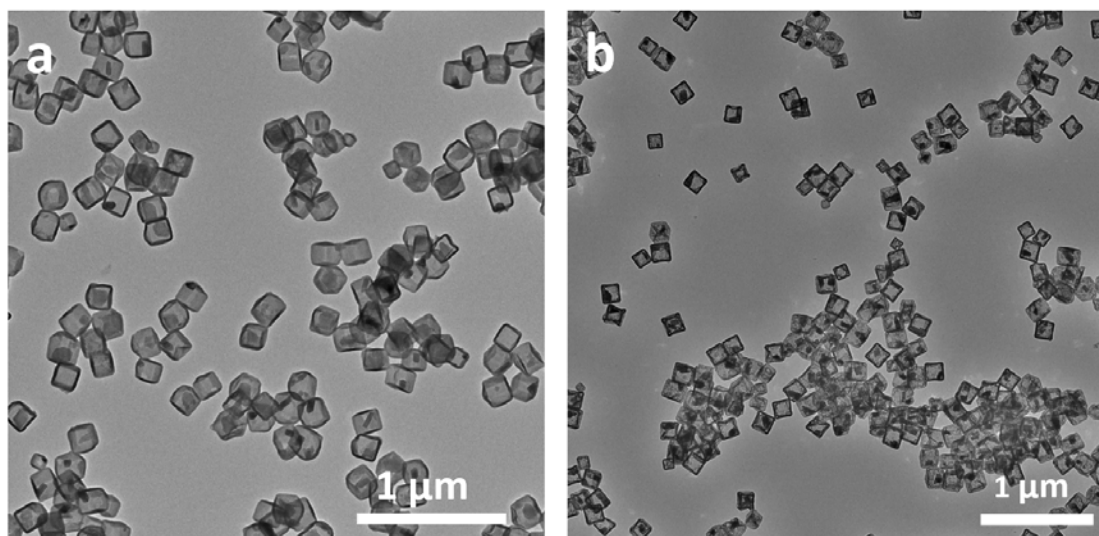

Figure S3. The TEM images of (a) Au-nanoboxes and (b) Pd-nanoboxes.

When the 0.1 mmol  $K_2PtCl_4$  was replaced by 0.075 mmol  $NaAuCl_4 \cdot 2H_2O$  and 0.075 mmol  $Na_2PdCl_4$  in the solvothermal reaction, the Au-nanoboxes and Pb-nanoboxes can be obtained. As shown in the Fig R5, both Au-nanoboxes and Pb-nanoboxes exhibited similar hollow structure and the ZnO interior core as the Pt system.

| Elements | at% (XPS) | wt% (XPS) | wt% (ICP-OES) |
|----------|-----------|-----------|---------------|
| C        | 56.82     | 26.31     | -             |
| N        | 20.64     | 11.14     | -             |
| O        | 11.57     | 7.13      | -             |
| Cl       | 2.99      | 4.09      | -             |
| Zn       | 1.75      | 4.41      | 4.66          |
| Pt       | 6.24      | 46.92     | 47.38         |

Table S1. XPS and ICP-OES elemental analysis results of A-Pt NBs.

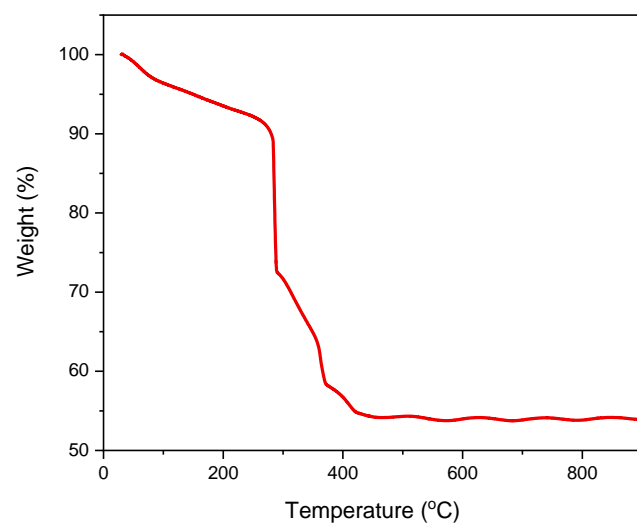

Figure S4. TGA profile of A-Pt NBs.

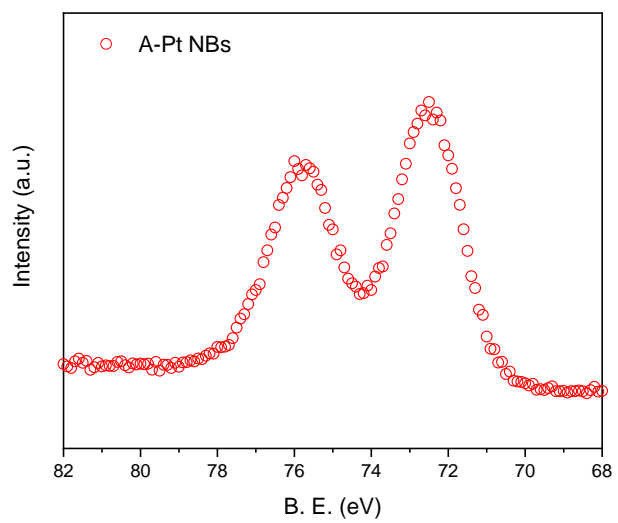

Figure S5. XPS spectra of A-Pt NBs.

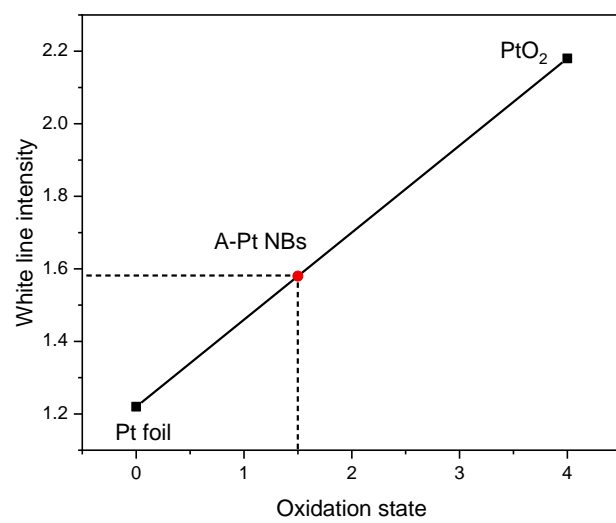

Figure S6. The semi-quantitative analysis based on the white line intensity of XANES for A-Pt NBs.



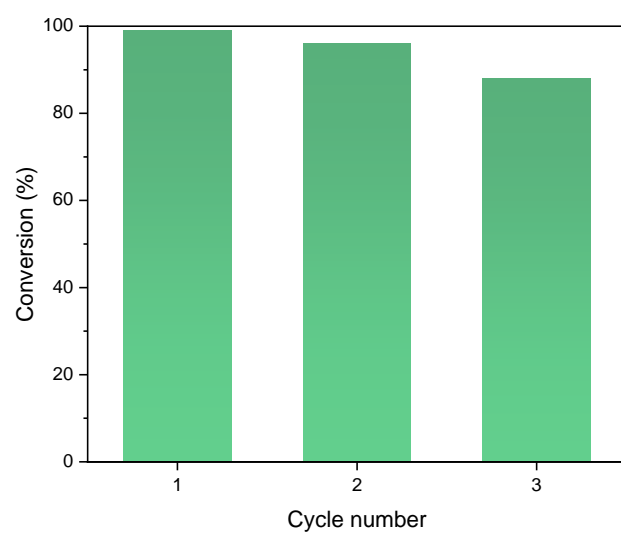

Figure S7. Recycling test of A-Pt NBs for the C-H bond borylation of arenes.

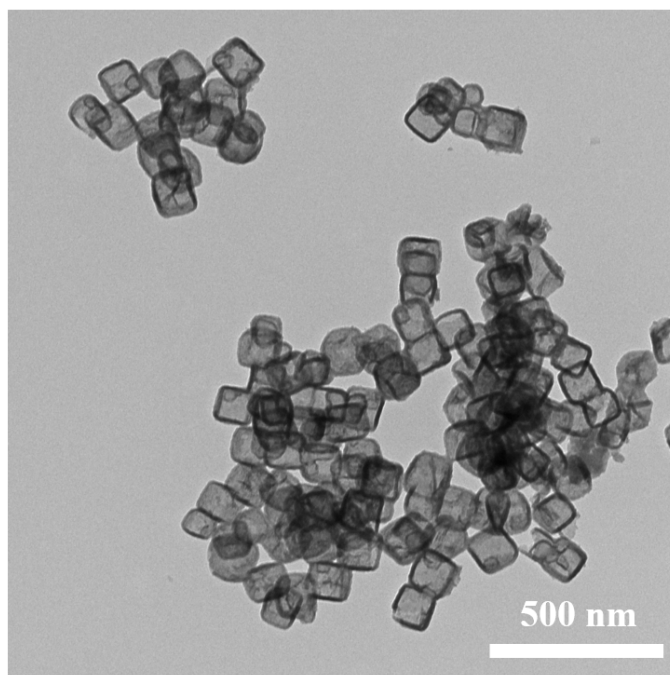

Figure S8. TEM images of catalysts obtained after catalytic tests.

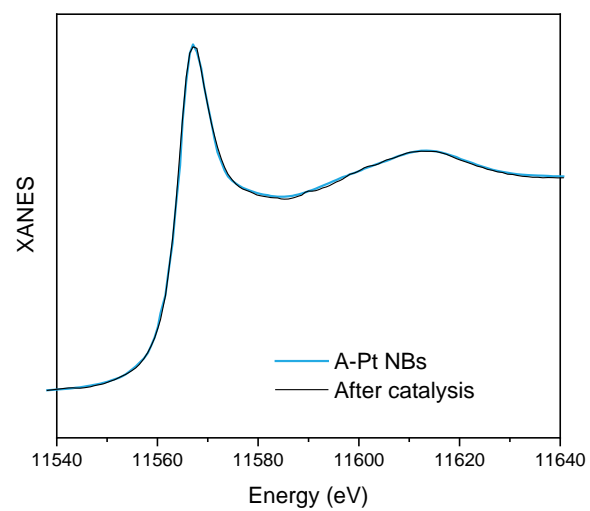

Figure S9. XANES of A-Pt NBs and catalysts obtained after three catalytic cycles.

| Entry          | Substrate                                                                         | Product                                                                           | Conversion (%) |
|----------------|-----------------------------------------------------------------------------------|-----------------------------------------------------------------------------------|----------------|
| 1              |  |  | 94             |
| 2              |  |  | 83             |
| 3              |  |  | 45             |
| 4              |  |  | 68             |
| 5              |  |  | 54             |
| 6 <sup>a</sup> |  |  | 98             |
| 7              |  |  | 95             |

a. The reaction was under N<sub>2</sub>.

Figure S10. C-H bond borylation of various arenes with A-Pt NBs.
